Correction

# Correction: Population-Attributable Causes of Cancer in Korea: Obesity and Physical Inactivity

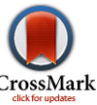

The *PLOS ONE* Staff

The image for Figure 1 is incorrect. Please see the correct Figure 1 here.

---

**Citation:** The *PLOS ONE* Staff (2014) Correction: Population-Attributable Causes of Cancer in Korea: Obesity and Physical Inactivity. *PLoS ONE* 9(7): e102930. doi:10.1371/journal.pone.0102930

**Published** July 11, 2014

**Copyright:** © 2014 The *PLOS ONE* Staff. This is an open-access article distributed under the terms of the Creative Commons Attribution License, which permits unrestricted use, distribution, and reproduction in any medium, provided the original author and source are credited.

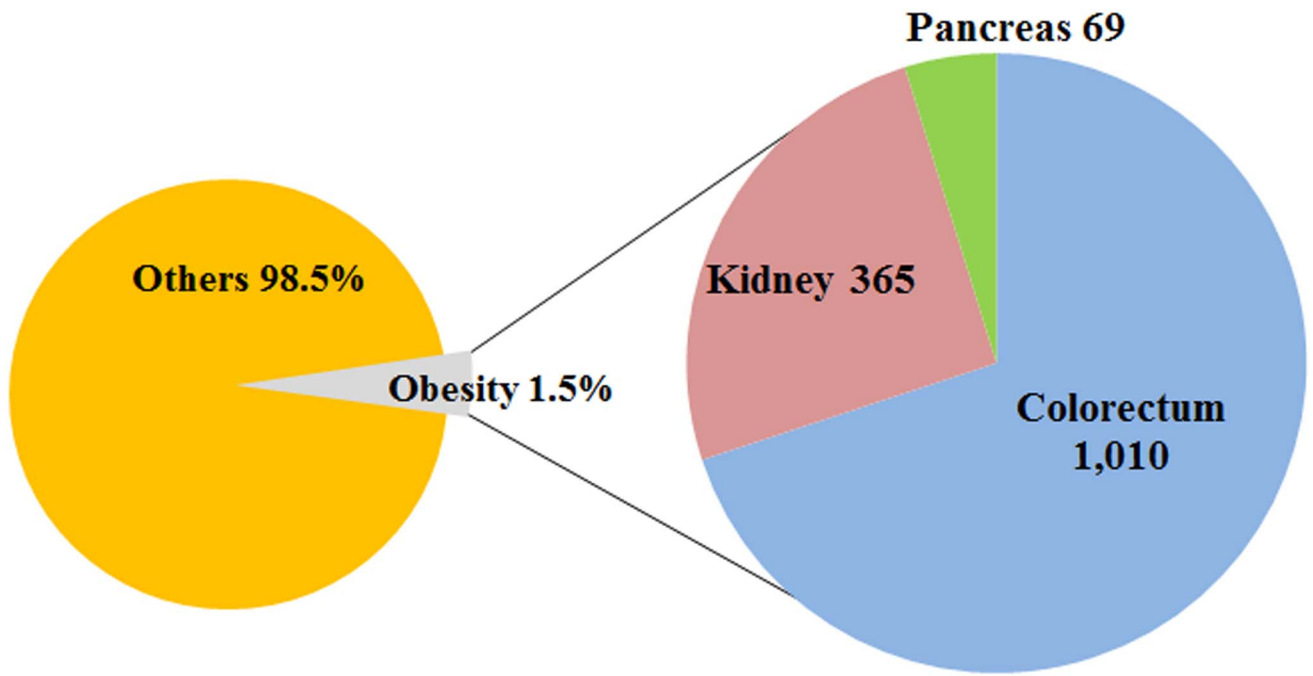

### (A) Men

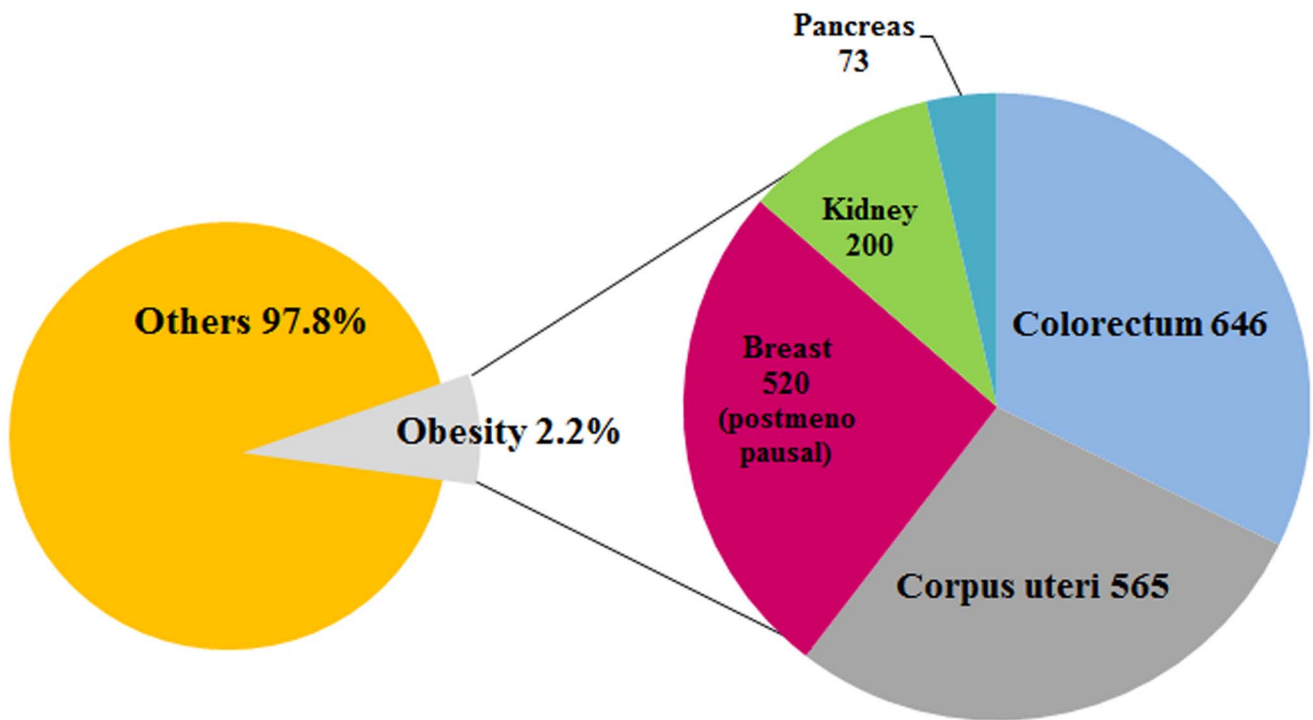

### (B) Women

**Figure 1.** Population-attributable fractions for obesity by cancer site: (A) for Korean men and (B) for Korean women.  
doi:10.1371/journal.pone.0090871.g001

## Reference

1. Park S, Kim Y, Shin H-R, Lee B, Shin A, et al. (2014) Population-Attributable Causes of Cancer in Korea: Obesity and Physical Inactivity. *PLoS ONE* 9(4): e90871. doi:10.1371/journal.pone.0090871
